# Supplementary material
Source: HighWire-hosted journal article supplement (https://cmajopen-stage.highwire.org/highwire/filestream/85602/field_highwire_adjunct_files/4/2020-0222-5-at.pdf)
Supplement: 2020-0222-5-at.pdf [file 2020-0222-5-at.pdf]

# GRADE Tables for All Outcomes by Intervention Category

**Supplemental Table S3: GRADE – Physical Activity (overall)**

**GRADE evidence rating: Physical activity interventions compared to usual care for older adults living with frailty or pre-frailty**

| Certainty assessment                                                                                                                                                                 |                   |                      |                          |              |                          |                      | № of patients         |            | Effect                                             | Certainty        | Importance |
|--------------------------------------------------------------------------------------------------------------------------------------------------------------------------------------|-------------------|----------------------|--------------------------|--------------|--------------------------|----------------------|-----------------------|------------|----------------------------------------------------|------------------|------------|
| № of studies                                                                                                                                                                         | Study design      | Risk of bias         | Inconsistency            | Indirectness | Imprecision              | Other considerations | Physical activity int | usual care | Relative / Absolute (95% CI)                       |                  |            |
| 1. Mobility (follow up: range 8 weeks to 12 months; assessed with: Performance measures (Gait speed, Timed up & go, chair sit & stand, balance, short physical performance battery)) |                   |                      |                          |              |                          |                      |                       |            |                                                    |                  |            |
| 19 <sup>a</sup>                                                                                                                                                                      | randomised trials | serious <sup>b</sup> | not serious <sup>c</sup> | not serious  | not serious <sup>d</sup> | none                 | 946                   | 778        | SMD 0.6 SD higher<br>(0.37 higher to 0.83 higher)  | ⊕⊕⊕○<br>MODERATE | CRITICAL   |
| 2. Activities of daily living (follow up: range 8 weeks to 12 months; assessed with: ADL / IADL instruments)                                                                         |                   |                      |                          |              |                          |                      |                       |            |                                                    |                  |            |
| 9 <sup>e</sup>                                                                                                                                                                       | randomised trials | serious <sup>f</sup> | not serious <sup>c</sup> | not serious  | not serious <sup>d</sup> | none                 | 495                   | 415        | SMD 0.5 SD higher<br>(0.15 higher to 0.84 higher)  | ⊕⊕⊕○<br>MODERATE | CRITICAL   |
| 3. Cognitive function (follow up: range 8 weeks to 6 months; assessed with: MMSE, LOTCA-G, rey memory score, RBANS z-score)                                                          |                   |                      |                          |              |                          |                      |                       |            |                                                    |                  |            |
| 5 <sup>g</sup>                                                                                                                                                                       | randomised trials | serious <sup>h</sup> | not serious <sup>c</sup> | not serious  | not serious <sup>i</sup> | none                 | 186                   | 191        | SMD 0.35 SD higher<br>(0.09 higher to 0.61 higher) | ⊕⊕⊕○<br>MODERATE | CRITICAL   |
| 4. Quality of life (follow up: range 12 weeks to 9 months; assessed with: : SF-36 Physical & Mental component, EQ5D-VAS, SSWO score)                                                 |                   |                      |                          |              |                          |                      |                       |            |                                                    |                  |            |
| 6 <sup>j</sup>                                                                                                                                                                       | randomised trials | serious <sup>k</sup> | not serious <sup>c</sup> | not serious  | not serious <sup>i</sup> | none                 | 260                   | 240        | SMD 0.6 SD higher<br>(0.13 higher to 1.07 higher)  | ⊕⊕⊕○<br>MODERATE | CRITICAL   |

| Certainty assessment |              |              |               |              |             |                      | № of patients         |            | Effect                       | Certainty | Importance |
|----------------------|--------------|--------------|---------------|--------------|-------------|----------------------|-----------------------|------------|------------------------------|-----------|------------|
| № of studies         | Study design | Risk of bias | Inconsistency | Indirectness | Imprecision | Other considerations | Physical activity int | usual care | Relative / Absolute (95% CI) |           |            |

**5. Frailty (follow up: range 6 weeks to 6 months; assessed with: Cardiovascular Health Study, Edmonton frailty, Modified Fried criteria)**

|                |                   |                      |                          |             |                          |      |     |     |                                                        |                  |          |
|----------------|-------------------|----------------------|--------------------------|-------------|--------------------------|------|-----|-----|--------------------------------------------------------|------------------|----------|
| 4 <sup>l</sup> | randomised trials | serious <sup>m</sup> | not serious <sup>c</sup> | not serious | not serious <sup>i</sup> | none | 120 | 124 | <b>SMD 1.29 SD lower</b><br>(2.22 lower to 0.36 lower) | ⊕⊕⊕○<br>MODERATE | CRITICAL |
|----------------|-------------------|----------------------|--------------------------|-------------|--------------------------|------|-----|-----|--------------------------------------------------------|------------------|----------|

**6. Prevalence of Frailty (follow up: range 8 weeks to 24 months; assessed with: Number frail at post-intervention)**

|                |                   |                      |                          |             |                          |      |                    |                    |                                  |                                                            |                  |          |
|----------------|-------------------|----------------------|--------------------------|-------------|--------------------------|------|--------------------|--------------------|----------------------------------|------------------------------------------------------------|------------------|----------|
| 4 <sup>n</sup> | randomised trials | serious <sup>o</sup> | not serious <sup>c</sup> | not serious | not serious <sup>p</sup> | none | 166/763<br>(21.8%) | 246/775<br>(31.7%) | <b>RR 0.58</b><br>(0.36 to 0.93) | <b>133 fewer per 1,000</b><br>(from 203 fewer to 22 fewer) | ⊕⊕⊕○<br>MODERATE | CRITICAL |
|----------------|-------------------|----------------------|--------------------------|-------------|--------------------------|------|--------------------|--------------------|----------------------------------|------------------------------------------------------------|------------------|----------|

**7. Incidence of Fall (follow up: range 20 weeks to 12 months; assessed with: Number of events at post-intervention)**

|                |                   |                      |                      |             |                      |      |                    |                    |                                  |                                                           |                  |          |
|----------------|-------------------|----------------------|----------------------|-------------|----------------------|------|--------------------|--------------------|----------------------------------|-----------------------------------------------------------|------------------|----------|
| 4 <sup>q</sup> | randomised trials | serious <sup>r</sup> | serious <sup>s</sup> | not serious | serious <sup>t</sup> | none | 156/420<br>(37.1%) | 137/304<br>(45.1%) | <b>RR 0.80</b><br>(0.51 to 1.26) | <b>90 fewer per 1,000</b><br>(from 221 fewer to 117 more) | ⊕○○○<br>VERY LOW | CRITICAL |
|----------------|-------------------|----------------------|----------------------|-------------|----------------------|------|--------------------|--------------------|----------------------------------|-----------------------------------------------------------|------------------|----------|

| Certainty assessment |              |              |               |              |             |                      | № of patients         |            | Effect                       | Certainty | Importance |
|----------------------|--------------|--------------|---------------|--------------|-------------|----------------------|-----------------------|------------|------------------------------|-----------|------------|
| № of studies         | Study design | Risk of bias | Inconsistency | Indirectness | Imprecision | Other considerations | Physical activity int | usual care | Relative / Absolute (95% CI) |           |            |

**8. Fatigue level (follow up: range 8 weeks to 6 months; assessed with: VAS Fatigue intensity, Chinese fatigue inventory, SF-12 subscale)**

|                |                   |                      |                          |             |                      |      |    |    |                                                         |             |          |
|----------------|-------------------|----------------------|--------------------------|-------------|----------------------|------|----|----|---------------------------------------------------------|-------------|----------|
| 3 <sup>u</sup> | randomised trials | serious <sup>v</sup> | not serious <sup>w</sup> | not serious | serious <sup>x</sup> | none | 92 | 92 | <b>SMD 0.27 SD lower</b><br>(0.65 lower to 0.12 higher) | ⊕⊕○○<br>LOW | CRITICAL |
|----------------|-------------------|----------------------|--------------------------|-------------|----------------------|------|----|----|---------------------------------------------------------|-------------|----------|

**CI:** Confidence interval; **SMD:** Standardised mean difference; **RR:** Risk ratio

**Note:** There was only data from one included study, and therefore no GRADE, for the following outcomes; Health Services Use

## Explanations

- Kuo, 2018; Gill, 2002; Brown, 2000; Tsang, 2013; Chen, 2019; Clegg, 2014; Yoon, 2018; Takatori, 2016; Tieland, 2015; Faber, 2006; Losa-Reyna, 2019; Liu, 2017; Santabalbina, 2016; Pin Ng, 2015; Kwon, 2015; Daniel, 2012; Gine-Garriga, 2010; Binder, 2002; de Jong, 2000
- 11 out of 19 studies were rated as unclear risk (9 studies) and high risk (2 studies) with concerns regarding randomization, allocation concealment, blinding, incomplete and selective outcome reporting, and other risk of bias (such as baseline imbalance across groups).
- High statistical heterogeneity observed, however, the direction of effect is consistent across most studies with overlapping confidence intervals and statistical heterogeneity is likely due to small versus large effects observed across studies.
- The sample size is adequate ( $\geq 300$ ) in both intervention and control arms and effect estimate is precise (Confidence intervals do not include the no effect value "0").
- Kuo, 2018; Gill, 2002; Clegg, 2014; Faber, 2006; Santabalbina, 2016; Daniel, 2012; Gine-Garriga, 2010; Binder, 2002; de Jong, 2000
- 4 out of 9 studies were rated as unclear risk with concerns regarding blinding, incomplete outcome reporting, and other risk of bias (such as baseline imbalance across groups).
- Kuo, 2018; Tsang, 2013; Yoon, 2018; Santabalbina, 2016; Pin Ng, 2015

- h. 3 out of 5 studies were rated as unclear risk with concerns regarding incomplete outcome reporting, and other risk of bias (such as baseline imbalance across groups).
- i. The sample size is not adequate (<300) in each arm, however, effect estimate is precise with confidence intervals not including the no effect value of "0". j. Clegg, 2014; Santabalbina, 2016; Kwon, 2015; Gine-Garriga, 2013; Binder, 2002; de Jong, 2000
- k. 4 out of 6 studies were rated as unclear risk with concerns regarding blinding, incomplete outcome reporting, and other risk of bias (such as baseline imbalance across groups).
- l. Yoon, 2018; Losa-Reyna, 2019; Santabalbina, 2016; Pin Ng, 2015
- m. 3 out of 4 studies were rated as unclear risk with concerns regarding incomplete outcome reporting, and other risk of bias (such as baseline imbalance across groups).
- n. Chen, 2019; Liu, 2018; Santabalbina, 2016; Pin Ng, 2015
- o. 2 out of 4 studies were rated as unclear risk with concerns regarding other risk of bias (such as baseline imbalance across groups).
- p. The sample size is adequate ( $\geq 300$ ) in both intervention and control arms and effect estimate is precise (Confidence intervals do not include the no effect value "1").
- q. Gill, 2002; Faber, 2006; Takatori, 2016; Pin Ng, 2015
- r. 1 out of 4 studies rated as high risk with concerns regarding randomization, allocation concealment, blinding and other risk of bias (such as baseline imbalance across groups).
- s. The direction of effect is not consistent and confidence intervals do not overlap with substantial level of statistical heterogeneity observed across studies.
- t. The sample size is adequate ( $\geq 300$ ) in each arm, however, the number of events are low and effect estimate is imprecise with confidence intervals including the no effect value of "1".
- u. Kuo, 2018; Liu, 2017; Pin Ng, 2015
- v. 1 out of 3 studies rated as high risk with concerns regarding randomization, allocation concealment, blinding and other risk of bias (such as baseline imbalance across groups).
- w. The confidence intervals overlap with moderate level of statistical heterogeneity observed across studies.
- x. The sample size is not adequate (<300) in each arm and effect estimate is imprecise with confidence intervals including the no effect value of "0".

**Supplemental Table S4: GRADE – Aerobic Physical Activity**

**GRADE evidence rating: Aerobic physical activity interventions compared to usual care for older adults living with frailty or pre-frailty**

| Certainty assessment                                                                                        |                   |                      |               |              |                           |                      | № of patients         |            | Effect                                                   | Certainty        | Importance |
|-------------------------------------------------------------------------------------------------------------|-------------------|----------------------|---------------|--------------|---------------------------|----------------------|-----------------------|------------|----------------------------------------------------------|------------------|------------|
| № of studies                                                                                                | Study design      | Risk of bias         | Inconsistency | Indirectness | Imprecision               | Other considerations | Aerobic interventions | usual care | Relative / Absolute (95% CI)                             |                  |            |
| 1. Mobility (follow up: mean 8 weeks; assessed with: Performance measures (Gait speed, Timed up & go test)) |                   |                      |               |              |                           |                      |                       |            |                                                          |                  |            |
| 1 <sup>a</sup>                                                                                              | randomised trials | serious <sup>b</sup> | not serious   | not serious  | serious <sup>c</sup>      | none                 | 15                    | 21         | SMD <b>0.71 SD higher</b><br>(0.23 higher to 1.2 higher) | ⊕⊕○○<br>LOW      | CRITICAL   |
| 2. Activities of daily living (follow up: mean 8 weeks; assessed with: ADL / IADL instruments)              |                   |                      |               |              |                           |                      |                       |            |                                                          |                  |            |
| 1 <sup>a</sup>                                                                                              | randomised trials | serious <sup>b</sup> | not serious   | not serious  | very serious <sup>d</sup> | none                 | 15                    | 21         | SMD <b>0.46 SD higher</b><br>(0.03 lower to 0.94 higher) | ⊕○○○<br>VERY LOW | CRITICAL   |
| 3. Cognitive function (follow up: mean 8 weeks; assessed with: MMSE score)                                  |                   |                      |               |              |                           |                      |                       |            |                                                          |                  |            |
| 1 <sup>a</sup>                                                                                              | randomised trials | serious <sup>b</sup> | not serious   | not serious  | very serious <sup>d</sup> | none                 | 15                    | 21         | SMD <b>0.15 SD higher</b><br>(0.5 lower to 0.8 higher)   | ⊕○○○<br>VERY LOW | CRITICAL   |
| 4. Fatigue level (follow up: mean 8 weeks; assessed with: VAS fatigue intensity)                            |                   |                      |               |              |                           |                      |                       |            |                                                          |                  |            |
| 1 <sup>a</sup>                                                                                              | randomised trials | serious <sup>b</sup> | not serious   | not serious  | very serious <sup>d</sup> | none                 | 15                    | 21         | SMD <b>0.39 SD lower</b><br>(0.87 lower to 0.09 higher)  | ⊕○○○<br>VERY LOW | CRITICAL   |

**CI:** Confidence interval; **SMD:** Standardised mean difference

**Note:** There was no data in the included studies for the following outcomes; Quality of Life, Frailty, Falls, Health Services Use

## Explanations

- a. Kuo, 2018
- b. The study had concerns regarding allocation concealment and other risk of bias (such as baseline imbalance across groups).
- c. The sample size is small (<30) in each arm, and effect estimate is imprecise with wide confidence intervals.
- d. The sample size is small (<30) in each arm, and effect estimate is imprecise with confidence intervals including the no effect value of "0"

Supplemental Table S5: GRADE – Muscle Strengthening Physical Activity

GRADE evidence rating: Muscle strengthening physical activity interventions compared to usual care for older adults living with frailty or pre-frailty

| Certainty assessment                                                                                                                                                                |                   |                      |                          |              |                           |                      | № of patients             |            | Effect                                                    | Certainty        | Importance |
|-------------------------------------------------------------------------------------------------------------------------------------------------------------------------------------|-------------------|----------------------|--------------------------|--------------|---------------------------|----------------------|---------------------------|------------|-----------------------------------------------------------|------------------|------------|
| № of studies                                                                                                                                                                        | Study design      | Risk of bias         | Inconsistency            | Indirectness | Imprecision               | Other considerations | Muscle strength ening int | usual care | Relative / Absolute (95% CI)                              |                  |            |
| 1. Mobility (follow up: range 8 weeks to 6 months; assessed with: Performance measures (Gait speed, Timed up & go, chair sit & stand, balance, short physical performance battery)) |                   |                      |                          |              |                           |                      |                           |            |                                                           |                  |            |
| 6 <sup>a</sup>                                                                                                                                                                      | randomised trials | serious <sup>b</sup> | not serious <sup>c</sup> | not serious  | not serious <sup>d</sup>  | none                 | 419                       | 303        | SMD <b>0.57 SD higher</b><br>(0.08 higher to 1.06 higher) | ⊕⊕⊕○<br>MODERATE | CRITICAL   |
| 2. Activities of daily living (follow up: range 12 weeks to 20 weeks; assessed with: ADL / IADL instruments)                                                                        |                   |                      |                          |              |                           |                      |                           |            |                                                           |                  |            |
| 2 <sup>e</sup>                                                                                                                                                                      | randomised trials | serious <sup>f</sup> | not serious              | not serious  | serious <sup>g</sup>      | none                 | 164                       | 114        | SMD <b>0.16 SD higher</b><br>(0.05 lower to 0.37 higher)  | ⊕⊕○○<br>LOW      | CRITICAL   |
| 3. Cognitive function (follow up: mean 16 weeks; assessed with: Rey memory score, cognitive flexibility, processing speed (TMT-A), frontal assessment battery (FAB))                |                   |                      |                          |              |                           |                      |                           |            |                                                           |                  |            |
| 1 <sup>h</sup>                                                                                                                                                                      | randomised trials | serious <sup>i</sup> | not serious              | not serious  | very serious <sup>j</sup> | none                 | 22                        | 23         | SMD <b>0.45 SD higher</b><br>(0.19 higher to 0.72 higher) | ⊕○○○<br>VERY LOW | CRITICAL   |
| 4. Quality of life (follow up: mean 12 weeks; assessed with: EQ5D-VAS)                                                                                                              |                   |                      |                          |              |                           |                      |                           |            |                                                           |                  |            |
| 1 <sup>k</sup>                                                                                                                                                                      | randomised trials | serious <sup>l</sup> | not serious              | not serious  | very serious <sup>m</sup> | none                 | 40                        | 30         | SMD <b>0.15 SD higher</b><br>(0.33 lower to 0.63 higher)  | ⊕○○○<br>VERY LOW | CRITICAL   |

**GRADE – Muscle Strengthening Physical Activity**

| Certainty assessment                                                                                               |                   |                      |                      |              |                           |                      | № of patients             |                   | Effect                                                 |                                                             | Certainty        | Importance |
|--------------------------------------------------------------------------------------------------------------------|-------------------|----------------------|----------------------|--------------|---------------------------|----------------------|---------------------------|-------------------|--------------------------------------------------------|-------------------------------------------------------------|------------------|------------|
| № of studies                                                                                                       | Study design      | Risk of bias         | Inconsistency        | Indirectness | Imprecision               | Other considerations | Muscle strength ening int | usual care        | Relative / Absolute (95% CI)                           |                                                             |                  |            |
| 5. Frailty (follow up: mean 16 weeks; assessed with: Cardiovascular Health Study criteria)                         |                   |                      |                      |              |                           |                      |                           |                   |                                                        |                                                             |                  |            |
| 1 <sup>h</sup>                                                                                                     | randomised trials | serious <sup>i</sup> | not serious          | not serious  | very serious <sup>m</sup> | none                 | 22                        | 23                | SMD <b>0.2 SD lower</b><br>(0.79 lower to 0.39 higher) |                                                             | ⊕○○○<br>VERY LOW | CRITICAL   |
| 6. Prevalence of Frailty (assessed with: Number Frail at post-intervention)                                        |                   |                      |                      |              |                           |                      |                           |                   |                                                        |                                                             |                  |            |
| 1 <sup>n</sup>                                                                                                     | randomised trials | not serious          | not serious          | not serious  | serious <sup>o</sup>      | none                 | 6/33<br>(18.2%)           | 29/33<br>(87.9%)  | RR <b>0.21</b><br>(0.10 to 0.43)                       | <b>694 fewer per 1,000</b><br>(from 791 fewer to 501 fewer) | ⊕⊕⊕○<br>MODERATE | CRITICAL   |
| 7. Incidence of Fall (follow up: range 20 weeks to 6 months; assessed with: Number of events at post-intervention) |                   |                      |                      |              |                           |                      |                           |                   |                                                        |                                                             |                  |            |
| 2 <sup>p</sup>                                                                                                     | randomised trials | serious <sup>q</sup> | serious <sup>r</sup> | not serious  | serious <sup>s</sup>      | none                 | 102/280<br>(36.4%)        | 74/162<br>(45.7%) | RR <b>0.78</b><br>(0.37 to 1.65)                       | <b>100 fewer per 1,000</b><br>(from 288 fewer to 297 more)  | ⊕○○○<br>VERY LOW | CRITICAL   |

**CI:** Confidence interval; **SMD:** Standardised mean difference; **RR:** Risk ratio



## Explanations

- a. Chen, 2019; Clegg, 2014; Yoon, 2018; Takatori, 2016; Tieland, 2015; Faber, 2006
- b. 4 out of 6 studies were rated as unclear risk (3 studies) and high risk (1 study) with concerns regarding randomization, allocation concealment, blinding, incomplete and selective outcome reporting, and other risk of bias (such as baseline imbalance across groups).
- c. High statistical heterogeneity observed, however, the direction of effect is consistent across most studies with overlapping confidence intervals and statistical heterogeneity is likely due to small versus large effects observed across studies.
- d. The sample size is adequate ( $\geq 300$ ) in both intervention and control arms and effect estimate is precise (Confidence intervals do not include the no effect value "0").
- e. Clegg, 2014; Faber, 2006
- f. 1 out of 2 studies were rated as unclear risk with concerns regarding blinding, incomplete outcome reporting, and other risk of bias (such as baseline imbalance across groups).
- g. The sample size is not adequate ( $< 300$ ) in each arm and effect estimate is imprecise with confidence intervals including the no effect value of "0". h. Yoon, 2018
- i. The study had concerns regarding randomization, allocation concealment, incomplete outcome reporting and other risk of bias (such as baseline imbalance across groups).
- j. The sample size is small ( $< 30$ ) in each arm, and effect estimate is imprecise with wide confidence intervals. k. Clegg, 2014
- l. The study had concerns regarding randomization, blinding, allocation concealment, incomplete outcome reporting and other risk of bias (such as baseline imbalance across groups).
- m. The sample size is small ( $< 30$ ) in each arm, and effect estimate is imprecise with confidence intervals including the no effect value of "0" n. Chen, 2019
- o. The sample size is not adequate ( $< 300$ ) in each arm, and effect estimate is imprecise with wide confidence intervals.
- p. Faber, 2006; Takatori, 2016
- q. 1 out of 2 studies rated as high risk with concerns regarding randomization, allocation concealment, blinding and other risk of bias (such as baseline imbalance across groups).
- r. The direction of effect is not consistent and confidence intervals do not overlap with substantial level of statistical heterogeneity observed across studies.
- s. The sample size is not adequate ( $< 300$ ) in each arm and effect estimate is imprecise with confidence intervals including the no effect value of "1".

Supplemental Table S6: GRADE – Mobility & Rehab Physical Activity

GRADE evidence rating: Mobility & Rehab physical activity interventions compared to usual care for older adults living with frailty or pre-frailty

| Certainty assessment                                                                                                                                                                  |                   |                      |                          |              |                          |                      | № of patients        |            | Effect                                                    | Certainty        | Importance |
|---------------------------------------------------------------------------------------------------------------------------------------------------------------------------------------|-------------------|----------------------|--------------------------|--------------|--------------------------|----------------------|----------------------|------------|-----------------------------------------------------------|------------------|------------|
| № of studies                                                                                                                                                                          | Study design      | Risk of bias         | Inconsistency            | Indirectness | Imprecision              | Other considerations | Mobility & Rehab int | usual care | Relative / Absolute (95% CI)                              |                  |            |
| 1. Mobility (follow up: range 12 weeks to 12 months; assessed with: Performance measures (Gait speed, Timed up & go, chair sit & stand, balance, short physical performance battery)) |                   |                      |                          |              |                          |                      |                      |            |                                                           |                  |            |
| 3 <sup>a</sup>                                                                                                                                                                        | randomised trials | serious <sup>b</sup> | not serious <sup>c</sup> | not serious  | not serious <sup>d</sup> | none                 | 175                  | 155        | SMD <b>0.29 SD higher</b><br>(0.17 higher to 0.42 higher) | ⊕⊕⊕○<br>MODERATE | CRITICAL   |
| 2. Activities of daily living (follow up: mean 12 months; assessed with: ADL / IADL instruments)                                                                                      |                   |                      |                          |              |                          |                      |                      |            |                                                           |                  |            |
| 1 <sup>e</sup>                                                                                                                                                                        | randomised trials | serious <sup>f</sup> | not serious              | not serious  | not serious <sup>d</sup> | none                 | 91                   | 91         | SMD <b>0.48 SD higher</b><br>(0.28 higher to 0.67 higher) | ⊕⊕⊕○<br>MODERATE | CRITICAL   |
| 3. Cognitive function (follow up: mean 12 weeks; assessed with: LOTCA-G)                                                                                                              |                   |                      |                          |              |                          |                      |                      |            |                                                           |                  |            |
| 1 <sup>g</sup>                                                                                                                                                                        | randomised trials | serious <sup>h</sup> | not serious              | not serious  | serious <sup>i</sup>     | none                 | 61                   | 55         | SMD <b>0.12 SD higher</b><br>(0.1 lower to 0.34 higher)   | ⊕⊕○○<br>LOW      | CRITICAL   |

GRADE – Mobility & Rehab Physical Activity

| Certainty assessment |              |              |               |              |             |                      | № of patients        |            | Effect                       | Certainty | Importance |
|----------------------|--------------|--------------|---------------|--------------|-------------|----------------------|----------------------|------------|------------------------------|-----------|------------|
| № of studies         | Study design | Risk of bias | Inconsistency | Indirectness | Imprecision | Other considerations | Mobility & Rehab int | usual care | Relative / Absolute (95% CI) |           |            |

**4. Incidence of Fall (follow up: mean 12 months; assessed with: Number of events at post-intervention)**

|                |                   |                      |             |             |                      |      |               |                |                               |                                                       |             |          |
|----------------|-------------------|----------------------|-------------|-------------|----------------------|------|---------------|----------------|-------------------------------|-------------------------------------------------------|-------------|----------|
| 1 <sup>e</sup> | randomised trials | serious <sup>f</sup> | not serious | not serious | serious <sup>j</sup> | none | 51/92 (55.4%) | 58/92 (63.0 %) | <b>RR 0.88</b> (0.69 to 1.12) | <b>76 fewer per 1,000</b> (from 195 fewer to 76 more) | ⊕⊕○○<br>LOW | CRITICAL |
|----------------|-------------------|----------------------|-------------|-------------|----------------------|------|---------------|----------------|-------------------------------|-------------------------------------------------------|-------------|----------|

**CI:** Confidence interval; **SMD:** Standardised mean difference; **RR:** Risk ratio

**Note:** There was no data in the included studies for the following outcomes; Quality of Life, Frailty, Fatigue, Health Services Use

## Explanations

a. Gill, 2002; Brown, 2000; Tsang, 2013

b. 2 out of 3 studies were rated as unclear risk with concerns regarding other risk of bias (such as baseline imbalance across groups).

c. The confidence intervals overlap with low statistical heterogeneity observed across studies.

d. The sample size is not adequate (<300) in each arm, however, effect estimate is precise with confidence intervals not including the no effect value of "0". e. Gill, 2002

f. The study had concerns regarding allocation concealment and other risk of bias (such as baseline imbalance across groups).

g. Tsang, 2013

h. The study had concerns regarding randomization, blinding, allocation concealment and other risk of bias (such as baseline imbalance across groups).

Appendix 5, as supplied by the authors. Appendix to: Racey M, Ali MU, Sherifali D, et al. Effectiveness of physical activity interventions in older adults with frailty or prefrailty: a systematic review and meta-analysis. *CMAJ Open* 2021. DOI:10.9778/cmajo.20200222. Copyright © 2021 The Author(s) or their employer(s). To receive this resource in an accessible format, please contact us at [cmajgroup.cmajca](mailto:cmajgroup.cmajca).

- i. The sample size is not adequate (<300) in each arm and effect estimate is imprecise with confidence intervals including the no effect value of "0".
- j. The sample size is not adequate (<300) in each arm and effect estimate is imprecise with confidence intervals including the no effect value of "1".

**Supplemental Table S7: GRADE – Mixed Physical Activity**

**GRADE evidence rating: Mixed physical activity interventions compared to usual care for older adults living with frailty or pre-frailty**

| Certainty assessment                                                                                                                                                                |                   |                      |                          |              |                          |                      | № of patients               |            | Effect                                                     | Certainty        | Importance |
|-------------------------------------------------------------------------------------------------------------------------------------------------------------------------------------|-------------------|----------------------|--------------------------|--------------|--------------------------|----------------------|-----------------------------|------------|------------------------------------------------------------|------------------|------------|
| № of studies                                                                                                                                                                        | Study design      | Risk of bias         | Inconsistency            | Indirectness | Imprecision              | Other considerations | Mixed physical activity int | usual care | Relative / Absolute (95% CI)                               |                  |            |
| 1. Mobility (follow up: range 6 weeks to 9 months; assessed with: Performance measures (Gait speed, Timed up & go, chair sit & stand, balance, short physical performance battery)) |                   |                      |                          |              |                          |                      |                             |            |                                                            |                  |            |
| 9 <sup>a</sup>                                                                                                                                                                      | randomised trials | serious <sup>b</sup> | not serious <sup>c</sup> | not serious  | not serious <sup>d</sup> | none                 | 337                         | 299        | SMD <b>0.75 SD higher</b><br>(0.4 higher to 1.1 higher)    | ⊕⊕⊕○<br>MODERATE | CRITICAL   |
| 2. Activities of daily living (follow up: range 12 weeks to 9 months; assessed with: ADL / IADL instruments)                                                                        |                   |                      |                          |              |                          |                      |                             |            |                                                            |                  |            |
| 5 <sup>e</sup>                                                                                                                                                                      | randomised trials | serious <sup>f</sup> | serious <sup>g</sup>     | not serious  | not serious <sup>h</sup> | none                 | 225                         | 189        | SMD <b>0.64 SD higher</b><br>(0.004 higher to 1.27 higher) | ⊕⊕○○<br>LOW      | CRITICAL   |
| 3. Cognitive function (follow up: mean 24 weeks; assessed with: MMSE, RBANS z-score)                                                                                                |                   |                      |                          |              |                          |                      |                             |            |                                                            |                  |            |
| 2 <sup>i</sup>                                                                                                                                                                      | randomised trials | serious <sup>j</sup> | not serious <sup>c</sup> | not serious  | not serious <sup>h</sup> | none                 | 88                          | 92         | SMD <b>0.62 SD higher</b><br>(0.12 higher to 1.11 higher)  | ⊕⊕⊕○<br>MODERATE | CRITICAL   |
| 4. Quality of life (follow up: range 12 weeks to 9 months; assessed with: SF-36 Physical & Mental component, EQ5D-VAS, SSWO score)                                                  |                   |                      |                          |              |                          |                      |                             |            |                                                            |                  |            |
| 5 <sup>k</sup>                                                                                                                                                                      | randomised trials | serious <sup>l</sup> | not serious <sup>c</sup> | not serious  | not serious <sup>h</sup> | none                 | 220                         | 210        | SMD <b>0.68 SD higher</b><br>(0.16 higher to 1.21 higher)  | ⊕⊕⊕○<br>MODERATE | CRITICAL   |

| Certainty assessment |              |              |               |              |             |                      |                             |            |                              | Certainty | Importance |
|----------------------|--------------|--------------|---------------|--------------|-------------|----------------------|-----------------------------|------------|------------------------------|-----------|------------|
| № of studies         | Study design | Risk of bias | Inconsistency | Indirectness | Imprecision | Other considerations | Mixed physical activity int | usual care | Relative / Absolute (95% CI) |           |            |

**5. Frailty (follow up: range 6 weeks to 6 months; assessed with: Cardiovascular Health Study, Edmonton frailty, Modified Fried criteria)**

|                |                   |                      |                          |             |                          |      |    |     |                                                        |                  |          |
|----------------|-------------------|----------------------|--------------------------|-------------|--------------------------|------|----|-----|--------------------------------------------------------|------------------|----------|
| 3 <sup>m</sup> | randomised trials | serious <sup>n</sup> | not serious <sup>c</sup> | not serious | not serious <sup>h</sup> | none | 98 | 101 | <b>SMD 1.57 SD lower</b><br>(2.57 lower to 0.57 lower) | ⊕⊕⊕○<br>MODERATE | CRITICAL |
|----------------|-------------------|----------------------|--------------------------|-------------|--------------------------|------|----|-----|--------------------------------------------------------|------------------|----------|

**6. Prevalence of Frailty (follow up: range 24 weeks to 24 months; assessed with: Number frail at post-intervention)**

|                |                   |                      |                          |             |                          |      |                    |                    |                                  |                                                           |                  |          |
|----------------|-------------------|----------------------|--------------------------|-------------|--------------------------|------|--------------------|--------------------|----------------------------------|-----------------------------------------------------------|------------------|----------|
| 3 <sup>o</sup> | randomised trials | serious <sup>n</sup> | not serious <sup>p</sup> | not serious | not serious <sup>q</sup> | none | 160/730<br>(21.9%) | 217/742<br>(29.2%) | <b>RR 0.72</b><br>(0.63 to 0.83) | <b>82 fewer per 1,000</b><br>(from 108 fewer to 50 fewer) | ⊕⊕⊕○<br>MODERATE | CRITICAL |
|----------------|-------------------|----------------------|--------------------------|-------------|--------------------------|------|--------------------|--------------------|----------------------------------|-----------------------------------------------------------|------------------|----------|

**7. Falls (follow up: mean 24 weeks; assessed with: Mean number)**

|                |                   |                      |             |             |                      |      |    |    |                                                         |             |          |
|----------------|-------------------|----------------------|-------------|-------------|----------------------|------|----|----|---------------------------------------------------------|-------------|----------|
| 1 <sup>r</sup> | randomised trials | serious <sup>s</sup> | not serious | not serious | serious <sup>t</sup> | none | 40 | 42 | <b>SMD 0.37 SD lower</b><br>(0.81 lower to 0.07 higher) | ⊕⊕○○<br>LOW | CRITICAL |
|----------------|-------------------|----------------------|-------------|-------------|----------------------|------|----|----|---------------------------------------------------------|-------------|----------|

| Certainty assessment                                                                                               |                   |                      |                      |              |                           |                      |                             | № of patients |                                               | Effect                                         |          | Certainty | Importance |
|--------------------------------------------------------------------------------------------------------------------|-------------------|----------------------|----------------------|--------------|---------------------------|----------------------|-----------------------------|---------------|-----------------------------------------------|------------------------------------------------|----------|-----------|------------|
| № of studies                                                                                                       | Study design      | Risk of bias         | Inconsistency        | Indirectness | Imprecision               | Other considerations | Mixed physical activity int | usual care    | Relative / Absolute (95% CI)                  |                                                |          |           |            |
| 8. Incidence of Fall (follow up: mean 6 months; assessed with: Number of events at post-intervention)              |                   |                      |                      |              |                           |                      |                             |               |                                               |                                                |          |           |            |
| 1 <sup>u</sup>                                                                                                     | randomised trials | not serious          | not serious          | not serious  | very serious <sup>v</sup> | none                 | 3/48 (6.3%)                 | 5/50 (10.0 %) | RR 0.62 (0.16 to 2.47)                        | 38 fewer per 1,000 (from 84 fewer to 147 more) | ⊕⊕○○ LOW | CRITICAL  |            |
| 9. Fatigue level (follow up: range 16 weeks to 6 months; assessed with: Chinese fatigue inventory, SF-12 subscale) |                   |                      |                      |              |                           |                      |                             |               |                                               |                                                |          |           |            |
| 2 <sup>w</sup>                                                                                                     | randomised trials | serious <sup>x</sup> | serious <sup>g</sup> | not serious  | serious <sup>t</sup>      | none                 | 77                          | 71            | SMD 0.23 SD lower (0.85 lower to 0.39 higher) | ⊕○○○ VERY LOW                                  | CRITICAL |           |            |
| 10. Health services use (follow up: mean 24 weeks; assessed with: Mean number of Emergency visits)                 |                   |                      |                      |              |                           |                      |                             |               |                                               |                                                |          |           |            |
| 1 <sup>r</sup>                                                                                                     | randomised trials | serious <sup>s</sup> | not serious          | not serious  | serious <sup>t</sup>      | none                 | 40                          | 42            | SMD 0.21 SD lower (0.65 lower to 0.23 higher) | ⊕⊕○○ LOW                                       | CRITICAL |           |            |

| Certainty assessment |              |              |               |              |             |                      |                             |            |                              | Certainty | Importance |
|----------------------|--------------|--------------|---------------|--------------|-------------|----------------------|-----------------------------|------------|------------------------------|-----------|------------|
| Nº of studies        | Study design | Risk of bias | Inconsistency | Indirectness | Imprecision | Other considerations | Mixed physical activity int | usual care | Relative / Absolute (95% CI) |           |            |

**11. Health services use (follow up: mean 6 months; assessed with: Number hospitalized at post-intervention)**

|                |                   |             |             |             |                           |      |             |             |                               |                                                       |          |          |
|----------------|-------------------|-------------|-------------|-------------|---------------------------|------|-------------|-------------|-------------------------------|-------------------------------------------------------|----------|----------|
| 1 <sup>u</sup> | randomised trials | not serious | not serious | not serious | very serious <sup>v</sup> | none | 1/48 (2.1%) | 2/50 (4.0%) | <b>RR 0.52</b> (0.05 to 5.56) | <b>19 fewer per 1,000</b> (from 38 fewer to 182 more) | ⊕⊕○○ LOW | CRITICAL |
|----------------|-------------------|-------------|-------------|-------------|---------------------------|------|-------------|-------------|-------------------------------|-------------------------------------------------------|----------|----------|

**CI:** Confidence interval; **SMD:** Standardised mean difference; **RR:** Risk ratio

## Explanations

- Losa-Reyna, 2019; Liu, 2017; Santabalbina, 2016; Pin Ng, 2015; Kwon, 2015; Daniel, 2012; Gine-Garriga, 2010; F. Binder, 2002; de Jong, 2000
- 5 out of 9 studies were rated as unclear risk (4 studies) and high risk (1 study) with concerns regarding randomization, allocation concealment, blinding, incomplete and selective outcome reporting, and other risk of bias (such as baseline imbalance across groups).
- High statistical heterogeneity observed, however, the direction of effect is consistent across most studies with overlapping confidence intervals and statistical heterogeneity is likely due to small versus large effects observed across studies.
- The sample size is adequate ( $\geq 300$ ) in both intervention and control arms and effect estimate is precise (Confidence intervals do not include the no effect value "0").
- Santabalbina, 2016; Daniel, 2012; Gine-Garriga, 2010; Binder, 2002; de Jong, 2000
- 3 out of 5 studies were rated as unclear risk with concerns regarding blinding, incomplete outcome reporting, and other risk of bias (such as baseline imbalance across groups).
- The direction of effect is not consistent and confidence intervals do not overlap with substantial level of statistical heterogeneity observed across studies.



### GRADE – Mixed Physical Activity

- h. The sample size is not adequate (<300) in each arm, however, effect estimate is precise with confidence intervals not including the no effect value of "0". i. Santabalbina, 2016; Pin Ng, 2015
- j. 1 out of 2 studies were rated as unclear risk with concerns regarding randomization, allocation concealment and other risk of bias (such as baseline imbalance across groups).
- k. Santabalbina, 2016; Kwon, 2015; Gine-Garriga, 2013; Binder, 2002; de Jong, 2000
- l. 3 out of 5 studies were rated as unclear risk with concerns regarding blinding, incomplete outcome reporting, and other risk of bias (such as baseline imbalance across groups).
- m. Losa-Reyna, 2019; Santabalbina, 2016; Pin Ng, 2015
- n. 2 out of 3 studies were rated as unclear risk with concerns regarding blinding, incomplete outcome reporting, and other risk of bias (such as baseline imbalance across groups).
- o. Liu, 2018; Santabalbina, 2016; Pin Ng, 2015
- p. The confidence intervals overlap with low statistical heterogeneity observed across studies.
- q. The sample size is adequate ( $\geq 300$ ) in both intervention and control arms and effect estimate is precise (Confidence intervals do not include the no effect value "1").
- r. Santabalbina, 2016
- s. The study had concerns regarding randomization, allocation concealment and other risk of bias (such as baseline imbalance across groups).
- t. The sample size is not adequate (<300) in each arm and effect estimate is imprecise with confidence intervals including the no effect value of "0". u. Pin Ng, 2015
- v. The sample size is not adequate (<300) in each arm and observed number of events are very low with imprecise effect estimate (wide confidence intervals including the no effect value of "1"). w. Liu, 2017; Pin Ng, 2015
- x. 1 out of 2 studies rated as high risk with concerns regarding randomization, allocation concealment, blinding and other risk of bias (such as baseline imbalance across groups).
